# Supplementary material
Source: HighWire-hosted journal article supplement (https://cmajopen.ca/highwire/filestream/90685/field_highwire_adjunct_files/2/open-2022-0252-3-at.pdf)
Supplement: open-2022-0252-3-at.pdf [file open-2022-0252-3-at.pdf]

**Appendix: Excerpt from initial recruitment survey**

Registration survey question: subjective report of baseline mindfulness experience

How would you describe your current knowledge of mindfulness?

- 0 - None
- 1 - Some knowledge (0-2 years experience)
- 2 - Quite detailed (3-5 years experience)
- 3 - Very knowledgeable (5+ years experience)
